# Supplementary material for: Growth of New, Optically Active, Semi-Organic Single Crystals Glycine-Copper Sulphate Doped by Silver Nanoparticles
Source: MDPI journal article supplement (doi:10.3390/applnano4020007), 2023-04-18
Supplement: s1 [file s1]

## Supplementary Information

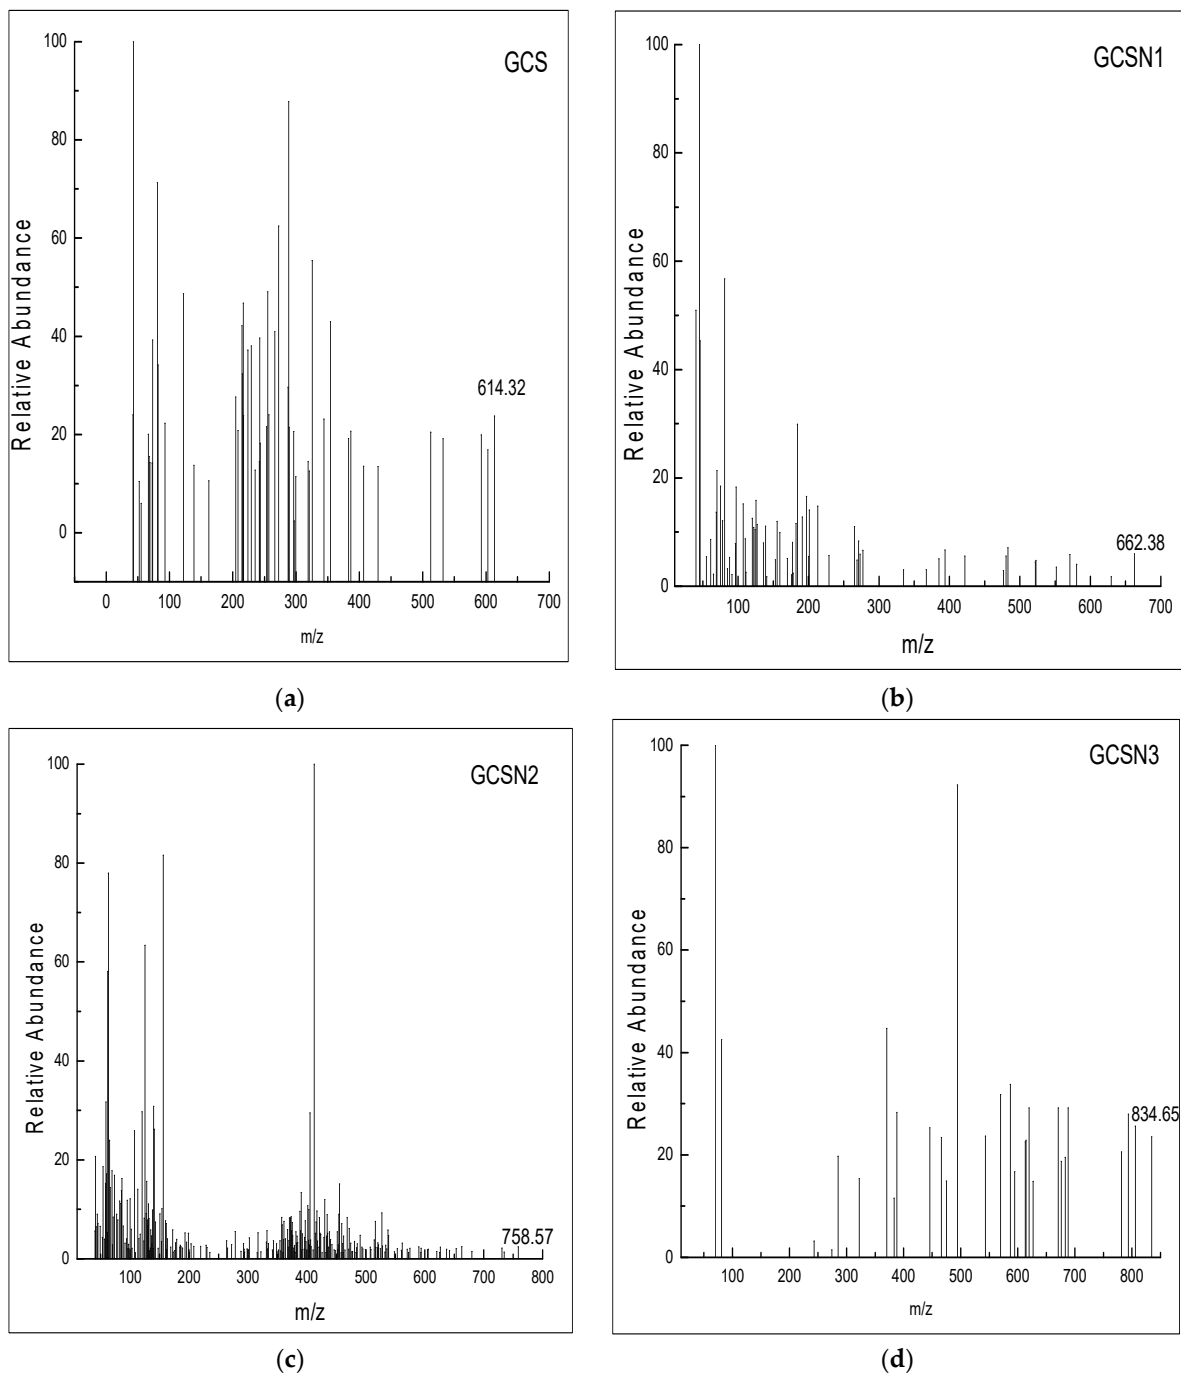

**Figure S1.** Mass spectra of the single crystals (a) GCS, (b) GCSN1, (c) GCSN2 and (d) GCSN3.

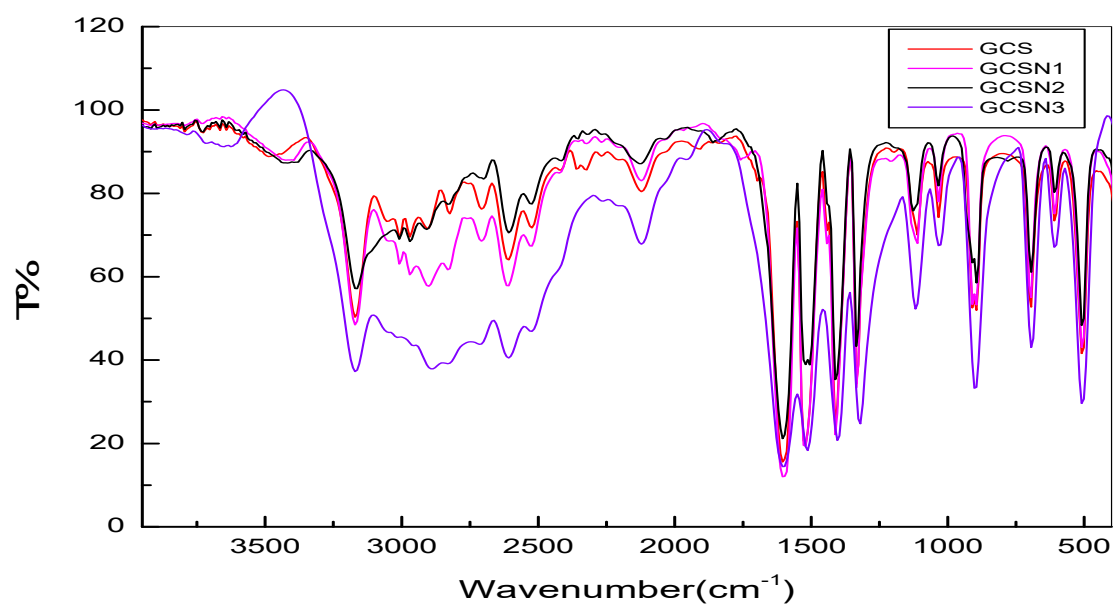

**Figure S2.** FTIR spectra of the single crystals GCS, GCSN1, GCSN2 and GCSN3

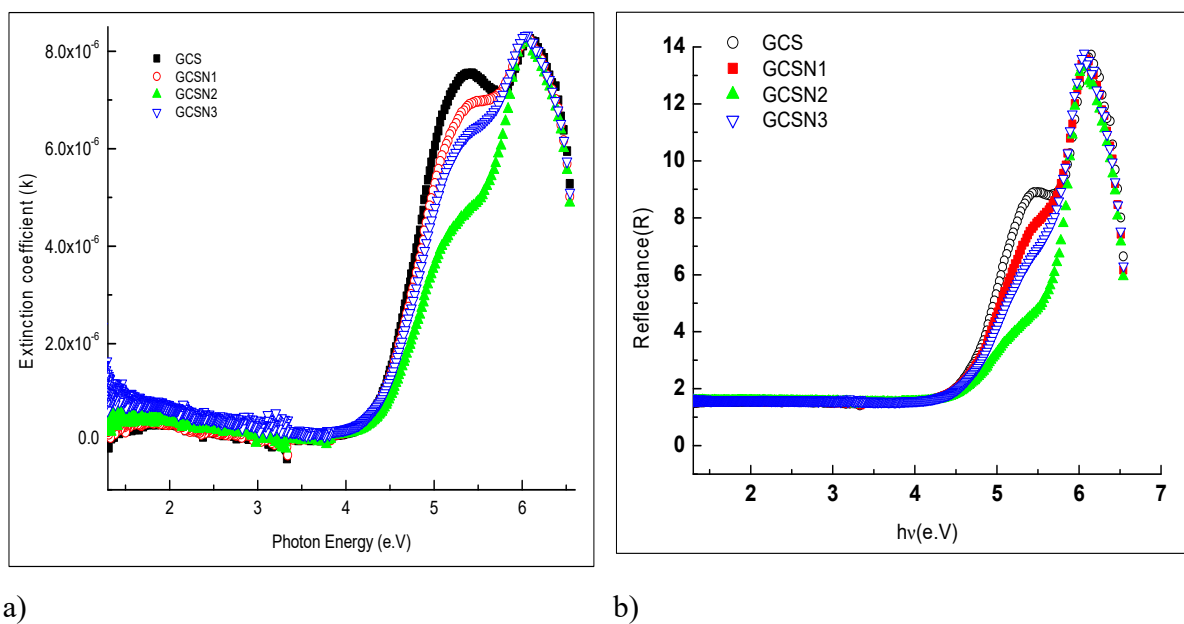

**Figure S3.** Plot extinction coefficient (k) a) and reflectance versus b) photon energy (eV) of GCS, GCSN1, GCSN2, and GCSN3

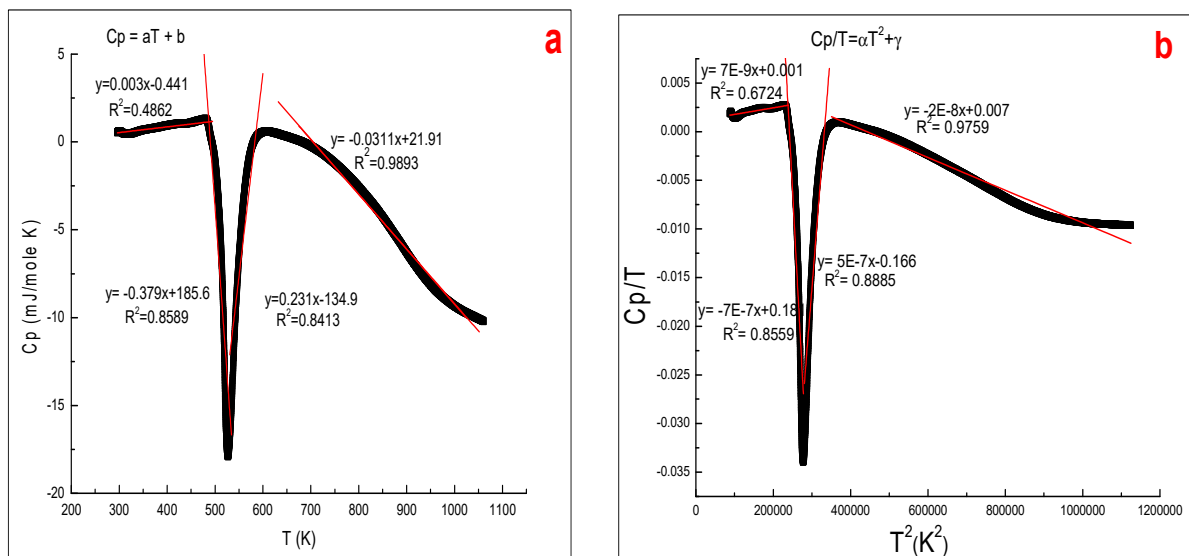

**Figure S4.** DSC curves for GCS crystals: a. specific heat capacity versus  $T$ , b.  $C_p/T$  versus  $T^2$

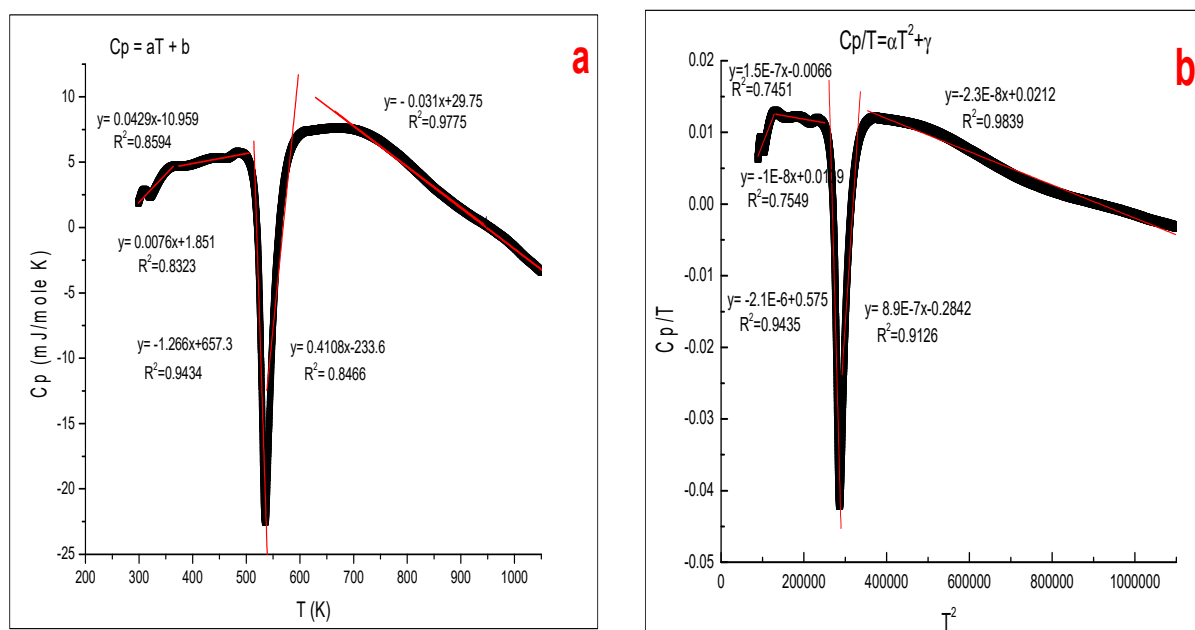

**Figure S5.** DSC curves for GCSN1 crystal: a. specific heat capacity versus  $T$ , b.  $C_p/T$  versus  $T^2$

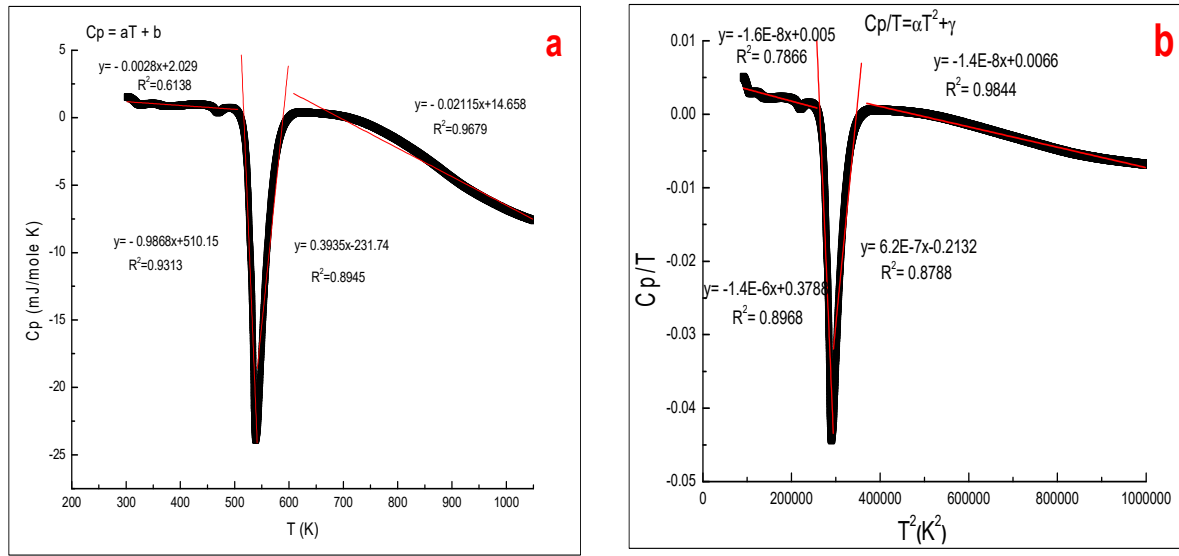

**Figure S6.** DSC curves for GCSN2 crystal: a. specific heat capacity versus T, b.  $C_p/T$  versus  $T^2$

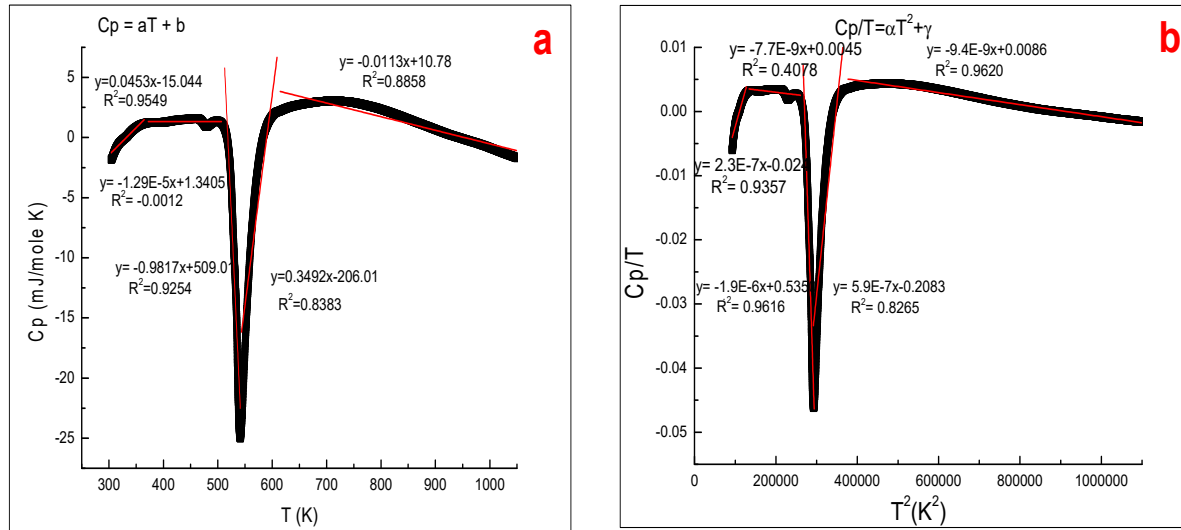

**Figure S7.** DSC curves for GCSN3 crystal: a. Specific heat capacity versus T, b.  $C_p/T$  versus  $T^2$

**Table S1.** Indexed PXRD patterns of GCS, GCSN1, GCSN2 and GCSN3 single crystals.

|     | $2\theta_{(EXP)}$ | $2\theta_{(calc.)}$ | $d(A)_{(EXP.)}$ | $d(A)_{(calc.)}$ | (hkl)   | FWHM    | Intensity % |
|-----|-------------------|---------------------|-----------------|------------------|---------|---------|-------------|
| GCS | 14.793            | 14.694              | 5.984           | 6.024            | (1 1 1) | 0.10816 | 16.5        |
|     | 18.948            | 19.189              | 4.680           | 4.622            | (1 1 2) | 0.19770 | 10.7        |
|     | 20.110            | 20.148              | 4.412           | 4.404            | (1 3 0) | 0.22609 | 6.3         |

|       |        |        |       |         |                  |         |      |
|-------|--------|--------|-------|---------|------------------|---------|------|
|       | 21.757 | 21.573 | 4.081 | 4.116   | (1 3 1)          | 0.12424 | 5.7  |
|       | 23.947 | 23.863 | 3.713 | 3.726   | ( $\bar{1}$ 3 2) | 0.20968 | 28.1 |
|       | 25.301 | 25.460 | 3.517 | 3.492   | ( $\bar{2}$ 0 2) | 0.11876 | 26.4 |
|       | 29.225 | 29.358 | 3.053 | 3.040   | ( $\bar{1}$ 1 4) | 0.17638 | 15.2 |
|       | 29.850 | 29.920 | 2.991 | 2.984   | ( $\bar{2}$ 1 3) | 0.16647 | 100  |
|       | 35.453 | 35.436 | 2.530 | 2.531   | (3 0 1)          | 0.23238 | 13.5 |
|       | 36.570 | 36.556 | 2.455 | 2.456   | ( $\bar{2}$ 5 1) | 0.14855 | 15.9 |
|       | 39.091 | 39.072 | 2.302 | 2.304   | ( $\bar{3}$ 1 3) | 0.23715 | 5.7  |
| GCSN1 | 14.933 | 14.694 | 5.928 | 6.024   | (1 1 1)          | 0.10397 | 20.8 |
|       | 19.103 | 19.189 | 4.642 | 4.622   | (1 1 2)          | 0.18306 | 22.7 |
|       | 20.241 | 20.148 | 4.384 | 4.404   | (1 3 0)          | 0.22134 | 11.9 |
|       | 24.049 | 23.863 | 3.698 | 3.726   | ( $\bar{1}$ 3 2) | 0.14705 | 49.2 |
|       | 25.412 | 25.460 | 3.502 | 3.492   | ( $\bar{2}$ 0 2) | 0.16699 | 7.3  |
|       | 28.574 | 28.603 | 3.121 | 3.119   | ( $\bar{2}$ 3 1) | 0.33073 | 16.5 |
|       | 29.367 | 29.358 | 3.039 | 3.040   | ( $\bar{1}$ 1 4) | 0.37904 | 24.9 |
|       | 29.655 | 29.920 | 2.981 | 2.984   | ( $\bar{2}$ 1 3) | 0.22498 | 100  |
|       | 35.506 | 35.436 | 2.526 | 2.531   | (3 0 1)          | 0.26609 | 15.8 |
|       | 36.687 | 36.556 | 2.448 | 2.456   | ( $\bar{2}$ 5 1) | 0.44061 | 14.1 |
|       | 42.999 | 42.908 | 2.101 | 2.10606 | (2 5 3)          | 0.19093 | 5    |
| GCSN2 | 14.525 | 14.770 | 6.094 | 5.993   | (1 0 2)          | 0.05715 | 38.9 |
|       | 21.722 | 21.741 | 4.088 | 4.084   | (2 $\bar{1}$ 2)  | 0.19028 | 21.5 |
|       | 25.250 | 25.338 | 3.524 | 3.512   | (0 $\bar{3}$ 1)  | 0.20217 | 100  |
|       | 29.250 | 29.241 | 3.051 | 3.052   | (1 $\bar{3}$ 2)  | 0.24578 | 32   |
|       | 29.812 | 29.792 | 2.995 | 2.997   | (2 0 4)          | 0.42668 | 11.3 |
|       | 30.098 | 30.095 | 2.967 | 2.967   | (2 3 2)          | 0.22946 | 7.6  |
|       | 35.834 | 35.808 | 2.504 | 2.506   | (4 $\bar{1}$ 0)  | 0.18380 | 13   |
|       | 39.029 | 39.097 | 2.306 | 2.302   | (2 2 5)          | 0.18239 | 53   |
|       | 44.347 | 44.398 | 2.041 | 2.038   | ( $\bar{4}$ 0 3) | 0.26253 | 5.7  |

|       |        |        |       |       |                           |         |      |
|-------|--------|--------|-------|-------|---------------------------|---------|------|
|       | 56.897 | 56.881 | 1.617 | 1.617 | $(\bar{5} \ \bar{3} \ 3)$ | 0.10013 | 6.8  |
|       | 64.723 | 64.747 | 1.439 | 1.438 | $(6 \ 5 \ 3)$             | 0.26932 | 2.2  |
| GCSN3 | 14.543 | 14.770 | 6.086 | 6.094 | $(1 \ 0 \ 2)$             | 0.14304 | 5.3  |
|       | 21.809 | 21.844 | 4.072 | 4.065 | $(\bar{2} \ 1 \ 1)$       | 0.18951 | 44.1 |
|       | 25.309 | 25.338 | 3.516 | 3.512 | $(0 \ \bar{3} \ 1)$       | 0.19153 | 100  |
|       | 29.306 | 29.241 | 3.045 | 3.052 | $(1 \ \bar{3} \ 2)$       | 0.19805 | 19.1 |
|       | 29.893 | 29.792 | 2.987 | 2.997 | $(2 \ 0 \ 4)$             | 0.37809 | 9.2  |
|       | 30.137 | 30.095 | 2.963 | 2.967 | $(2 \ 3 \ 2)$             | 0.21642 | 11   |
|       | 33.623 | 33.537 | 2.663 | 2.670 | $(\bar{3} \ 2 \ 1)$       | 0.18114 | 7.2  |
|       | 35.915 | 35.808 | 2.498 | 2.506 | $(4 \ \bar{1} \ 0)$       | 0.21649 | 30.4 |
|       | 39.070 | 39.097 | 2.304 | 2.302 | $(2 \ 2 \ 5)$             | 0.24879 | 23.5 |
|       | 44.442 | 44.398 | 2.037 | 2.038 | $(\bar{4} \ 0 \ 3)$       | 0.20159 | 11.4 |
|       | 56.254 | 56.881 | 1.631 | 1.617 | $(\bar{5} \ \bar{3} \ 3)$ | 0.68072 | 5.7  |
|       | 64.749 | 64.747 | 1.439 | 1.438 | $(6 \ 5 \ 3)$             | 0.31517 | 4.3  |
